# Supplementary material
Source: Research Square preprint supplement (doi:10.21203/rs.3.rs-9242306/v1)
Supplement: Supplementary file 1 [file 0a4a78a5d4f8e9ec7d8bda35.docx]

# Supplementary Material

**S1.** Map with the 39 YOD-specialised healthcare organisations (left), and the 66 regional integrated dementia care networks (right)


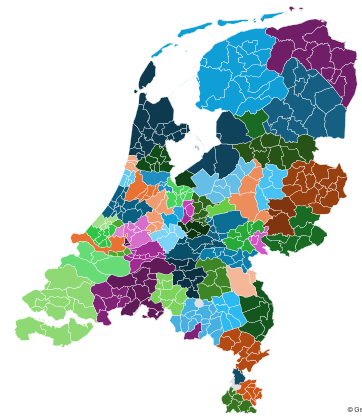

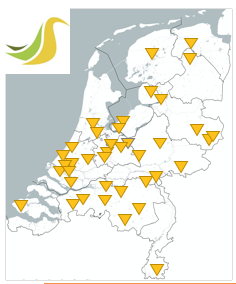

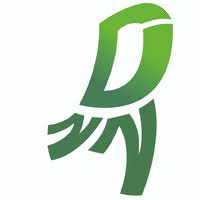


**S3.** Characteristics per regional YOD-specific network

| **Network** | **Used infrastructure** | **Aim of collaboration** | **Communication platform** | **Type of network coordinator** | **Allocated hours per week** | **Sufficient allocated hours** | **Structural funding of het network** | **Sufficient funding to initiate, develop or maintain the network** | **Governance model** | **Fully satisfied with composition of network** |
| --- | --- | --- | --- | --- | --- | --- | --- | --- | --- | --- |
| **A** | DNN | 1. Exchange knowledge  2. Collaborate | Email, website | Formal | 24 | Yes | Yes | Yes | Lead organisation | No |
| **B** | Other | 1. Exchange knowledge  2. Collaborate | Email, sessions | Other / informal | 2 | M | No | NA | Lead organisation | No |
| **C** | DNN | 1. Exchange knowledge  2. Collaborate | Secured mobile app *(Siilo)*,  Digital healthcare platforms (*VIP-live or zorgdomein*) | Formal | 24 | M | Yes | M | Lead organisation | No |
| **D** | DNN | 1. Exchange knowledge  2. Collaborate | Digital platforms *(Microsoft Teams or VIP-live)* | Formal | 12 | Yes | No | NA | Lead organisation | No |
| **E** | DNN | 1. Exchange knowledge  2. Collaborate | Email | Formal | 2 | No | M | M | Network administrative organisation | Yes |
| **F** | DNN | 2. Collaborate | Email, sessions | Formal | 8 | M | M | M | Lead organisation | Yes |
| **G** | Other | 1. Exchange knowledge  3. Other: Formalising | Email, website | Formal | 6 | Yes | No | NA | Lead organisation | No |
| **H** | DNN | 1. Exchange knowledge  2. Collaborate  3. Other: Formalising | Email, video calling | Other / informal | 0 | No | No | NA | Participant | No |
| **I** | DNN | 1. Exchange knowledge  2. Collaborate | Email, phone | Other / informal | 0 | M | M | M | Participant | Yes |
| **J** | DNN | 1. Exchange knowledge  2. Collaborate | Group sessions (*Policy circles of the network)* | Formal | 4 | Yes | Yes | Yes | Lead organisation | No |
| **K** | Other | 1. Exchange knowledge  2. Collaborate | Email, website, professional social networking platform *(LinkedIn)* | Other / informal | 0 | M | No | NA | Lead organisation | No |
| **L** | DNN | 1. Exchange knowledge | M | Formal | 24 | Yes | Yes | Yes | Lead organisation | Yes |
| **M** | DNN | 1. Exchange knowledge  2. Collaborate | Website, social media | Formal | 8 | M | Yes | M | Participant | No |
| **N** | DNN | 1. Exchange knowledge  2. Collaborate  3. Other: Peer support | Email, group sessions | Formal | 36 | Yes | Yes | Yes | Participant | No |
| **O** | DNN | 1. Exchange knowledge  2. Collaborate | Digital platforms (*Microsoft Teams, zorgdomein, Vecoso, Verwijspunt)* | Formal | 24 | Yes | Yes | Yes | Lead organisation | No |
| **P** | DNN | 1. Exchange knowledge  2. Collaborate | Through the network | Other / informal | M | M | Yes | M | M | No |
| *M=missing  NA=Not applicable | | | | | | | | | | |

**S4.** Perceived quality and accessibility per organisation among YOD-specific collaborations

|  |  | **Health care** | | | | | | **Social care** | | | | **Policy and research** | | **Other entities** | |
| --- | --- | --- | --- | --- | --- | --- | --- | --- | --- | --- | --- | --- | --- | --- | --- |
|  | **Overall** | **Nursing and home care organisations** | **Mental care organisations** | **Hospitals** | **General practitioners** | **Health insurers** | **Consultation centre of expertise*** | **Municipalities** | **Social welfare organisations** | **Volunteer organisations** | **Carer support organisations** | **Research centres** | **Regional departments of the Dutch Alzheimer’s Society** | **Other networks** | **Other** |
| *Total number* |  | N=12 | N=9 | N=10 | N=9 | N=9 | N=6 | N=10 | N=7 | N=3 | N=5 | N=5 | N=11 | N=1 | N=2 |
| ***Perceived quality*** | 3.80 [2-5] | Mean 4.42 [3-5] | Mean 3.44 [3-5] | Mean 3.70 [3-5] | Mean 3.89 [3-5] | Mean 3.44 [3-5] | Mean 4.67 [4-5] | Mean 3.40 [2-5] | Mean 4.00 [3-5] | Median 5.00 [4-5] | Median 4.00 [4-5] | Median 5.00 [4-5] | Mean 4.27 [2-5] | 3.00 | 2.50 [2-3] |
| *Total number* |  | N=14 | N=9 | N=11 | N=9 | N=8 | N=8 | N=10 | N=9 | N=3 | N=5 | N=7 | N=12 | N=0 | N=1 |
| ***Perceived accessibility*** | 3.75 [3-5] | Mean 4.21 [3-5] | Mean 3.44 [2-5] | Mean 3.63 [3-5] | Mean 3.78 [3-5] | Mean 3.63 [3-5] | Mean 3.88 [2-5] | Mean 3.10 [2-4] | Mean 3.89 [3-5] | Median 5 [3-5] | Median 4 [4-5] | Median 4 [4-5] | Mean 4 [2-5] | X | 3 |
| *Total number* |  | N=14 | N=5, M=1 | N=8, M=1 | N=9, M=1 | N=6 | N=5 | N=5, M=3 | N=8 | N=3, M=1 | N=3 | N=7, M=1 | N=11 | N=2 | N=4 |
| *The consultation centre of expertise is a national organisation providing tailored advice in complex care situations. | | | | | | | | | | | | | | | |

**S5.** Members of the YOD-included consortium

| Name | Affiliation |
| --- | --- |
| Alex Salazar | Alzheimer Center Amsterdam, Department of Neurology, Vrije Universiteit Amsterdam, Amsterdam, The Netherlands |
| Floor Duits | Alzheimer Center Amsterdam, Department of Neurology, Vrije Universiteit Amsterdam, Amsterdam, The Netherlands |
| Joan Groeneveld | Alzheimer Center Amsterdam, Department of Neurology, Vrije Universiteit Amsterdam, Amsterdam, The Netherlands |
| Louise van den Berg | Alzheimer Center Amsterdam, Department of Neurology, Vrije Universiteit Amsterdam, Amsterdam, The Netherlands |
| Paula Vanneste | Alzheimer Center Amsterdam, Department of Neurology, Vrije Universiteit Amsterdam, Amsterdam, The Netherlands |
| Rik Ossenkoppele | Alzheimer Center Amsterdam, Department of Neurology, Vrije Universiteit Amsterdam, Amsterdam, The Netherlands |
| Sven van der Lee | Alzheimer Center Amsterdam, Department of Neurology, Vrije Universiteit Amsterdam, Amsterdam, The Netherlands |
| Yolande Pijnenburg | Alzheimer Center Amsterdam, Department of Neurology, Vrije Universiteit Amsterdam, Amsterdam, The Netherlands |
| Marco Blom | Alzheimer Nederland, Amersfoort, The Netherlands |
| Hester Blok | Alzheimer Nederland, Amersfoort, The Netherlands |
| Dinant Bekkenkamp | Alzheimer Nederland, Amersfoort, The Netherlands |
| Hedwig de Vries | Beweging 3.0, Leusden, The Netherlands |
| Lieke de Vijlder | Beweging 3.0, Leusden, The Netherlands |
| Lydia Muller | Beweging 3.0, Leusden, The Netherlands |
| Jan Oyebode | Centre for Applied Dementia Studies, University of Bradford, Birmingham, United Kingdom |
| Atefrans de Bruin | De Waalboog, Nijmegen, The Netherlands |
| Eline Gooskens | De Waalboog, Nijmegen, The Netherlands |
| Adrie Gerritsen | De Wever, Tilburg, The Netherlands |
| Cantal van Vliet | De Wever, Tilburg, The Netherlands |
| Hanneke van de Wouw | De Wever, Tilburg, The Netherlands |
| Nynke Hosseinion-Schilder | De Wever, Tilburg, The Netherlands |
| Pieter Bakx | Department of Health Economics, Erasmus School of Health Policy & Management, Erasmus University Rotterdam, Rotterdam, the Netherlands |
| Esther van den Berg | Department of Neurology and Alzheimer Center Erasmus MC, Erasmus MC University Medical Center, Rotterdam, The Netherlands |
| Hanna Bodde | Department of Neurology and Alzheimer Center Erasmus MC, Erasmus MC University Medical Center, Rotterdam, The Netherlands |
| Harro Seelaar | Department of Neurology and Alzheimer Center Erasmus MC, Erasmus MC University Medical Center, Rotterdam, The Netherlands |
| Jackie Poos | Department of Neurology and Alzheimer Center Erasmus MC, Erasmus MC University Medical Center, Rotterdam, The Netherlands |
| Janne Papma | Department of Neurology and Alzheimer Center Erasmus MC, Erasmus MC University Medical Center, Rotterdam, The Netherlands |
| Liset de Boer | Department of Neurology and Alzheimer Center Erasmus MC, Erasmus MC University Medical Center, Rotterdam, The Netherlands |
| Lize Jiskoot | Department of Neurology and Alzheimer Center Erasmus MC, Erasmus MC University Medical Center, Rotterdam, The Netherlands |
| Barbara van Munster | Department of Geriatric Medicine, Alzheimer Center Groningen, University of Groningen, University Medical Center Groningen, Groningen, the Netherlands. |
| Floor Gelmers | Department of Neurology, Alzheimer Center Groningen, University of Groningen, University Medical Center Groningen, Groningen, the Netherlands. |
| Joke Spikman | Department of Neurology, Alzheimer Center Groningen, University of Groningen, University Medical Center Groningen, Groningen, the Netherlands. |
| Lise van Daele | Department of Geriatric Medicine, Alzheimer Center Groningen, University of Groningen, University Medical Center Groningen, Groningen, the Netherlands. |
| Marie-Christine van de Glind | Department of Neurology, Alzheimer Center Groningen, University of Groningen, University Medical Center Groningen, Groningen, the Netherlands. |
| Marlise van Eersel | Department of Geriatric Medicine, Alzheimer Center Groningen, University of Groningen, University Medical Center Groningen, Groningen, the Netherlands. |
| Myrthe Scheenen | Department of Neurology, Alzheimer Center Groningen, University of Groningen, University Medical Center Groningen, Groningen, the Netherlands. |
| Rients Huitema | Department of Neurology, Alzheimer Center Groningen, University of Groningen, University Medical Center Groningen, Groningen, the Netherlands. |
| Britt Appelhof | Department of Primary and Community Care, Radboud Alzheimer Center, Radboud University Medical Center, Nijmegen, The Netherlands |
| Christian Bakker | Department of Primary and Community Care, Radboud Alzheimer Center, Radboud University Medical Center, Nijmegen, The Netherlands |
| Jeroen Vermazeren | Department of Primary and Community Care, Radboud Alzheimer Center, Radboud University Medical Center, Nijmegen, The Netherlands |
| José Donkers | Department of Primary and Community Care, Radboud Alzheimer Center, Radboud University Medical Center, Nijmegen, The Netherlands |
| Judith Mellendijk | Department of Primary and Community Care, Radboud Alzheimer Center, Radboud University Medical Center, Nijmegen, The Netherlands |
| Merwin Mortier | Department of Primary and Community Care, Radboud Alzheimer Center, Radboud University Medical Center, Nijmegen, The Netherlands |
| Raymond Koopmans | Department of Primary and Community Care, Radboud Alzheimer Center, Radboud University Medical Center, Nijmegen, The Netherlands |
| Rianne de Heus | Department of Primary and Community Care, Radboud Alzheimer Center, Radboud University Medical Center, Nijmegen, The Netherlands |
| Sophie van Westendorp | Department of Primary and Community Care, Radboud Alzheimer Center, Radboud University Medical Center, Nijmegen, The Netherlands |
| Caitlin Hibbs | Department of Psychiatry and Neuropsychology/Alzheimer Center Limburg, School for Mental Health and Neuroscience, Maastricht University, Maastricht, The Netherlands |
| Charles David | Department of Psychiatry and Neuropsychology/Alzheimer Center Limburg, School for Mental Health and Neuroscience, Maastricht University, Maastricht, The Netherlands |
| Marjolein de Vugt | Department of Psychiatry and Neuropsychology/Alzheimer Center Limburg, School for Mental Health and Neuroscience, Maastricht University, Maastricht, The Netherlands |
| Maud Ritzen | Department of Psychiatry and Neuropsychology/Alzheimer Center Limburg, School for Mental Health and Neuroscience, Maastricht University, Maastricht, The Netherlands |
| Sara Bartels | Department of Psychiatry and Neuropsychology/Alzheimer Center Limburg, School for Mental Health and Neuroscience, Maastricht University, Maastricht, The Netherlands |
| Stevie Hendriks | Department of Psychiatry and Neuropsychology/Alzheimer Center Limburg, School for Mental Health and Neuroscience, Maastricht University, Maastricht, The Netherlands |
| Hendrik-Jan van der Waal | FTD Lotgenoten, The Netherlands |
| Saskia Danen | FTD Lotgenoten, The Netherlands |
| Carola Renders | Knowledge Center for Young-Onset Dementia, Amersfoort, The Netherlands |
| Chris Wallner | University of Applied Sciences Leiden, Faculty of Health , Leiden, The Netherlands. |
| Cynthia Hofman | Vilans, Centre of expertise for long-term care, Utrecht, the Netherlands. |
| Franka Dinnissen | Vilans, Centre of expertise for long-term care, Utrecht, the Netherlands. |
| Paula Gerring | Vilans, Centre of expertise for long-term care, Utrecht, the Netherlands. |
