# Supplementary material
Source: Research Square preprint supplement (doi:10.21203/rs.3.rs-9242306/v1)
Supplement: Supplementary file 2 [file 4fd2fc9a22e9d7e373caf332.pdf]

This domain contains questions on integrated care, specifically the YOD-specific collaborations with other organisations

| Number                                                                          | Question                                                                                                                                                                                                                                            | Response                                                                                                                                                                                                                                                                                                                                                                                       |
|---------------------------------------------------------------------------------|-----------------------------------------------------------------------------------------------------------------------------------------------------------------------------------------------------------------------------------------------------|------------------------------------------------------------------------------------------------------------------------------------------------------------------------------------------------------------------------------------------------------------------------------------------------------------------------------------------------------------------------------------------------|
| 1                                                                               | <p><b>Is the organisation part of a network for integrated care delivery for individuals with young-onset dementia via a network?</b><br/> <i>By this network we do not mean the affiliation with the Young-Onset Dementia Knowledge Center</i></p> | <p>Yes, part of at least one network other than the affiliation with the Young-Onset Dementia Knowledge Center</p> <p>No, however steps are currently being taken to establish such network. These steps include...</p> <p>.....</p> <p>No, but there are intentions to establish a network. This includes...</p> <p>No, there is no desire to be part of such network. This is because...</p> |
| <p><a href="#">If "No,..." has been selected, please proceed to page 30</a></p> |                                                                                                                                                                                                                                                     |                                                                                                                                                                                                                                                                                                                                                                                                |
| 1.1                                                                             | <p><b>If applicable, please specify the level at which the other network operates:</b><br/> <i>Multiple answers are possible.</i></p>                                                                                                               | <p>A network at the inter-regional level, other than the affiliation with the Young-Onset Knowledge Center.<br/> <a href="#">Go to page 2</a></p> <p>A network at the regional level. <a href="#">Go to page 9</a></p> <p>A network at the local level. <a href="#">Go to page 16</a></p> <p>A network at another level, namely.....</p> <p><a href="#">Go to page 23</a></p>                  |

If multiple answers have been selected, please proceed to all indicated pages

The following questions address YOD-specific collaborations at an inter-regional level

| Number | Question                                                                                                                                                                                                                                     | Response                                                                                                                                                                                |
|--------|----------------------------------------------------------------------------------------------------------------------------------------------------------------------------------------------------------------------------------------------|-----------------------------------------------------------------------------------------------------------------------------------------------------------------------------------------|
| 1      | <b>To which inter-regional network is the organisation affiliated with?</b>                                                                                                                                                                  | <input type="text"/>                                                                                                                                                                    |
| 2      | <b>What is the aim of collaborating?</b><br><i>Multiple answers are possible.</i>                                                                                                                                                            | <p>We exchange knowledge about individuals with young-onset dementia</p> <p>We jointly improve service delivery for individuals with young-onset dementia</p> <p>Other, namely.....</p> |
| 3      | <b>How many organisations are affiliated to this network?</b>                                                                                                                                                                                | <input type="text"/> organisations                                                                                                                                                      |
| 4      | <b>Please indicate which partners are currently part of the network to deliver integrated care for individuals with young-onset dementia? And to which extent is this collaboration formalised?</b><br><i>Multiple answers are possible.</i> |                                                                                                                                                                                         |
|        | Research Centres (for example universities or colleges)                                                                                                                                                                                      |                                                                                                                                                                                         |
| 4.1    | <b>If applicable, does a collaboration agreement exist?</b>                                                                                                                                                                                  |                                                                                                                                                                                         |
|        | Nursing and home care organisations (including casemanagement)                                                                                                                                                                               |                                                                                                                                                                                         |
| 4.2    | <b>If applicable, does a collaboration agreement exist?</b>                                                                                                                                                                                  |                                                                                                                                                                                         |
|        | General practitioners                                                                                                                                                                                                                        |                                                                                                                                                                                         |
| 4.3    | <b>If applicable, does a collaboration agreement exist?</b>                                                                                                                                                                                  |                                                                                                                                                                                         |
|        | Municipalities                                                                                                                                                                                                                               |                                                                                                                                                                                         |
| 4.4    | <b>If applicable, does a collaboration agreement exist?</b>                                                                                                                                                                                  |                                                                                                                                                                                         |
|        | Mental care organisations                                                                                                                                                                                                                    |                                                                                                                                                                                         |
| 4.5    | <b>If applicable, does a collaboration agreement exist?</b>                                                                                                                                                                                  |                                                                                                                                                                                         |
|        | Hospitals                                                                                                                                                                                                                                    |                                                                                                                                                                                         |
| 4.6    | <b>If applicable, does a collaboration agreement exist?</b>                                                                                                                                                                                  |                                                                                                                                                                                         |
|        | Health insurers                                                                                                                                                                                                                              |                                                                                                                                                                                         |
| 4.7    | <b>If applicable, does a collaboration agreement exist?</b>                                                                                                                                                                                  |                                                                                                                                                                                         |
|        | Social welfare organisations                                                                                                                                                                                                                 |                                                                                                                                                                                         |
| 4.8    | <b>If applicable, does a collaboration agreement exist?</b>                                                                                                                                                                                  |                                                                                                                                                                                         |
|        | Regional departments of the Dutch Alzheimer's Society                                                                                                                                                                                        |                                                                                                                                                                                         |
| 4.9    | <b>If applicable, does a collaboration agreement exist?</b>                                                                                                                                                                                  |                                                                                                                                                                                         |
|        | Consultation centre of expertise (CCE)                                                                                                                                                                                                       |                                                                                                                                                                                         |
| 4.10   | <b>If applicable, does a collaboration agreement exist?</b>                                                                                                                                                                                  |                                                                                                                                                                                         |
|        | Volunteer organisations                                                                                                                                                                                                                      |                                                                                                                                                                                         |
| 4.11   | <b>If applicable, does a collaboration agreement exist?</b>                                                                                                                                                                                  |                                                                                                                                                                                         |
|        | Care support organisations                                                                                                                                                                                                                   |                                                                                                                                                                                         |
| 4.12   | <b>If applicable, does a collaboration agreement exist?</b>                                                                                                                                                                                  |                                                                                                                                                                                         |
|        | Other networks                                                                                                                                                                                                                               |                                                                                                                                                                                         |
| 4.13   | <b>If applicable, does a collaboration agreement exist?</b>                                                                                                                                                                                  |                                                                                                                                                                                         |
|        | Other, namely.....                                                                                                                                                                                                                           |                                                                                                                                                                                         |
| 4.14   | <b>If applicable, does a collaboration agreement exist?</b>                                                                                                                                                                                  |                                                                                                                                                                                         |

5 **Please indicate which partners the organisation would like to include to the network?**

*Multiple answers are possible.*

- Research centres
- Nursing and home care organisations
- General practitioners
- Municipalities
- Mental care organisations
- Hospitals
- Health insurers
- Social welfare organisations
- Regional departments of the Dutch
- Alzheimer's Society
- Consultation centre of expertise
- Volunteer organisations
- Care support organisations
- Other, networks
- Other, namely.....
- None

5.2 **Are actions initiated to collaborate with currently missed partners?**

- Yes, namely.....
- .....
- No
- Unknown / prefer not to say

6 **What are the reasons to include or exclude these partners to the YOD-specific network?**

Please proceed to the next page.

The following questions address YOD-specific collaborations at an inter-regional level.

| Number | Question                                                                                                                                                             | Response                                                                                                                                                                                                                                                                                                                                                                                                                                                                                                                                                                                                                                                                                                                                                                                                                                                                                                                                                                                                                                                                                                                                                                                                |
|--------|----------------------------------------------------------------------------------------------------------------------------------------------------------------------|---------------------------------------------------------------------------------------------------------------------------------------------------------------------------------------------------------------------------------------------------------------------------------------------------------------------------------------------------------------------------------------------------------------------------------------------------------------------------------------------------------------------------------------------------------------------------------------------------------------------------------------------------------------------------------------------------------------------------------------------------------------------------------------------------------------------------------------------------------------------------------------------------------------------------------------------------------------------------------------------------------------------------------------------------------------------------------------------------------------------------------------------------------------------------------------------------------|
| 1      | <b>Which governance model does the network use?</b>                                                                                                                  | Participant governance; All network members govern the network<br><br>Lead organisation governance; 1 member of the network governs the network<br>Network Administrative Organisation governance; a separate administrative entity governs the network<br>Unknown / prefer not to say                                                                                                                                                                                                                                                                                                                                                                                                                                                                                                                                                                                                                                                                                                                                                                                                                                                                                                                  |
| 2      | <b>Is a network coordinator involved?</b><br><i>Referring to a person who was hired to improve and optimise a YOD-specific network for integrated care delivery.</i> | Yes<br><br>2.1 <b>If applicable, how many hours per week are allocated to the network coordinator?</b> <input type="text"/> hours<br><br>2.2 <b>If applicable, are the allocated hours considered sufficient to maintain, develop, or expand the YOD-specific network?</b><br>Yes, because.....<br>.....<br>No, because.....<br>.....<br>Unknown / prefer not to say<br><br>2.4 <b>If applicable, by whom is the salary of the network coordinator funded?</b><br>Municipality<br>A long-term care office<br>Other, namely.....<br>.....<br>Unknown / prefer not to say<br><br>No<br><br>2.5 <b>Is another person responsible for coordinating YOD-specific collaborations among organisations?</b><br><i>For example, a professional combining this role with other responsibilities</i><br>Yes, this is.....<br>.....<br>No<br><br>2.5.2 <b>If applicable, how many hours per week are allocated to this person for coordinating?</b> <input type="text"/> hours<br><br>2.5.3 <b>If applicable, are the allocated hours considered sufficient to maintain, develop, or expand the YOD-specific network?</b><br>Yes, because.....<br>.....<br>No, because.....<br>.....<br>Unknown / prefer not to say |

Please proceed to the next page

- 
3. **Does the network receives structural funding?**
- Yes  
No  
Unkown / prefer not to say
- 3.1 **If applicable, by whom is the network structural funded?**
- One funding source (health insurer, long-term care office, or municipallity)  
Contributions by the network  
One healthcare provider  
Combination of one funding source and contribution by the network  
Combination of one funding source and one healthcare provider  
Combination of one healthcare provider and contribution by the network
- 3.2 **If applicable, is the funding considered sufficient to maintain or develop the YOD-specific network?**
- Yes  
No  
Unknown / prefer not to say
- 
- 4 **Are there agreements within the network regarding the organisation of care and support?**
- 5.1 **If applicable, are these agreements similar to the agreements within the organisation?**
- Yes  
No  
Partly  
Unknown
- 5.2 **If applicable, are there agreements on which organisation delivers care and support directly after individuals with young-onset dementia recieve the diagnosis?**
- 5.3 **If applicable, when are case managers involved?**
- During the diagnostic process  
During the first 3 months after diagnosis  
After 3 months after diagnosis  
There are no agreements about this  
Case managers are not involved  
Other, namely.....  
.....

Please proceed to the next page.

The following questions address YOD-specific collaborations at an inter-regional level.

| Number | Question                                                                                                                                                                                                        | Response                                                                                                                                                  |
|--------|-----------------------------------------------------------------------------------------------------------------------------------------------------------------------------------------------------------------|-----------------------------------------------------------------------------------------------------------------------------------------------------------|
| 1      | <b>Which platforms are used by the organisation to communicate with the network?</b>                                                                                                                            |                                                                                                                                                           |
| 2      | <b>Please indicate the members of the network with whom the organisation has experience regarding their accessibility? And how would their accessibility be rated?</b><br><i>Multiple answers are possible.</i> |                                                                                                                                                           |
|        |                                                                                                                                                                                                                 | <div style="display: flex; justify-content: space-between;"> <span><i>Very poorly accessible</i></span> <span><i>Very easily accessible</i></span> </div> |
| 2.1    | Research centres (for example universities or colleges)<br><b>If applicable, rate their accessibility</b><br>Nursing and home care organisations (including case management)                                    |                                                                                                                                                           |
| 2.2    | <b>If applicable, rate their accessibility</b><br>General practitioners                                                                                                                                         |                                                                                                                                                           |
| 2.3    | <b>If applicable, rate their accessibility</b><br>Municipalities                                                                                                                                                |                                                                                                                                                           |
| 2.4    | <b>If applicable, rate their accessibility</b><br>Mental care organisations                                                                                                                                     |                                                                                                                                                           |
| 2.5    | <b>If applicable, rate their accessibility</b><br>Hospitals                                                                                                                                                     |                                                                                                                                                           |
| 2.6    | <b>If applicable, rate their accessibility</b><br>Health insurers                                                                                                                                               |                                                                                                                                                           |
| 2.7    | <b>If applicable, rate their accessibility</b> Social welfare organisations                                                                                                                                     |                                                                                                                                                           |
| 2.8    | <b>If applicable, rate their accessibility</b><br>Regional departments of the Dutch Alzheimer's Society                                                                                                         |                                                                                                                                                           |
| 2.9    | <b>If applicable, rate their accessibility</b><br>Consultation centre for expertise (CCE)                                                                                                                       |                                                                                                                                                           |
| 2.10   | <b>If applicable, rate their accessibility</b><br>Volunteer organisations                                                                                                                                       |                                                                                                                                                           |
| 2.11   | <b>If applicable, rate their accessibility</b><br>Support care organisations                                                                                                                                    |                                                                                                                                                           |
| 2.12   | <b>If applicable, rate their accessibility</b><br>Other networks                                                                                                                                                |                                                                                                                                                           |
| 2.13   | <b>If applicable, rate their accessibility</b><br>Other, namely.....                                                                                                                                            |                                                                                                                                                           |
| 2.14   | <b>If applicable, rate their accessibility</b>                                                                                                                                                                  |                                                                                                                                                           |

3 **Please indicate the members of the network with whom the organisation has experience collaborating. And how would this collaboration be rated?**

*Multiple answers are possible.*

Research centres (for example, universities or colleges) *Very poor collaboration* *Very good collaboration*

3.1 **If applicable, rate the collaboration**  
Nursing and home care organisations (including case management)

3.2 **If applicable, rate the collaboration**  
General practitioners

3.3 **If applicable, rate the collaboration**  
Municipalities

3.4 **If applicable, rate the collaboration**  
Mental care organisations

3.5 **If applicable, rate the collaboration**  
Hospitals

3.6 **If applicable, rate their accessibility**  
Health insurers

3.7 **If applicable, rate their accessibility**  
Social welfare organisations

3.8 **If applicable, rate their accessibility**  
Regional departments of the Dutch Alzheimer's Society

3.9 **If applicable, rate their accessibility**  
Consultation centre for expertise (CCE)

3.10 **If applicable, rate their accessibility**  
Volunteer organisations

3.11 **If applicable, rate the collaboration**  
Support care organisations

3.12 **If applicable, rate the collaboration**  
Other networks

3.13 **If applicable, rate the collaboration**  
Other, namely.....

3.14 **If applicable, rate the collaboration**

4 **Please indicate the experience of the organisation in terms of collaborating with providers of these services. And how would this collaboration be rated?**

*Multiple answers are possible.*

Case managers *Very poor collaboration* *Very good collaboration*

4.1 **If applicable, rate the collaboration**  
Day care treatment

4.2 **If applicable, rate the collaboration**  
Day care services

4.3 **If applicable, rate the collaboration**  
Nursing homes

4.4 **If applicable, rate the collaboration**  
Other, namely.....

4.5 **If applicable, rate the collaboration**

The following questions address YOD-specific collaborations at an inter-regional level.

| Number | Question                                                                                          | Response                                                    |
|--------|---------------------------------------------------------------------------------------------------|-------------------------------------------------------------|
| 1      | <b>Please describe succesful elements in the current collaborations within the network.</b>       | <div style="border: 1px dashed black; height: 75px;"></div> |
| 2      | <b>Please describe hindering elements in the current collaborations within the network.</b>       | <div style="border: 1px dashed black; height: 75px;"></div> |
| 3      | <b>Are actions initiated to address these hindering elements?</b>                                 | Yes<br>No<br>Not applicable<br>Unknown / prefer not to say  |
| 4      | <b>Are there any additional comments about the collaboration within the YOD-specific network?</b> | <div style="border: 1px dashed black; height: 75px;"></div> |

If the organisation is part of other networks, please procees to all indicated pages:

at a regional level: [page 9](#)

at a local level: [page 16](#)

at another level: [page 23](#)

If the organisation is **not** part of other networks, please proceed to [page 30](#)

The following questions include YOD-specific collaborations at the regional level

| Number | Question                                                                                                                                                                                                                                        | Response                                                                                                                                                                                |
|--------|-------------------------------------------------------------------------------------------------------------------------------------------------------------------------------------------------------------------------------------------------|-----------------------------------------------------------------------------------------------------------------------------------------------------------------------------------------|
| 1      | <b>To which regional network is the organisation affiliated with:</b>                                                                                                                                                                           | <input type="text"/>                                                                                                                                                                    |
| 2      | <b>What is the aim of collaborating?</b><br><i>Multiple answers are possible.</i>                                                                                                                                                               | <p>We exchange knowledge about individuals with young-onset dementia</p> <p>We jointly improve service delivery for individuals with young-onset dementia</p> <p>Other, namely.....</p> |
| 3      | <b>How many organisations are affiliated to this network?</b>                                                                                                                                                                                   | <input type="text"/> organisations                                                                                                                                                      |
| 4      | <b>Please indicate which partners are currently part of the network to deliver integrated care for individuals with young-onset dementia? And to which extent is this collaboration is formalised?</b><br><i>Multiple answers are possible.</i> |                                                                                                                                                                                         |
|        | Research Centers (for example universities or colleges)                                                                                                                                                                                         |                                                                                                                                                                                         |
| 4.1    | <b>If applicable, does a collaboration agreement exist?</b>                                                                                                                                                                                     |                                                                                                                                                                                         |
|        | Nursing and home care organisations (including casemanagement)                                                                                                                                                                                  |                                                                                                                                                                                         |
| 4.2    | <b>If applicable, does a collaboration agreement exist?</b>                                                                                                                                                                                     |                                                                                                                                                                                         |
|        | General practitioners                                                                                                                                                                                                                           |                                                                                                                                                                                         |
| 4.3    | <b>If applicable, does a collaboration agreement exist?</b>                                                                                                                                                                                     |                                                                                                                                                                                         |
|        | Municipalities                                                                                                                                                                                                                                  |                                                                                                                                                                                         |
| 4.4    | <b>If applicable, does a collaboration agreement exist?</b>                                                                                                                                                                                     |                                                                                                                                                                                         |
|        | Mental care organisations                                                                                                                                                                                                                       |                                                                                                                                                                                         |
| 4.5    | <b>If applicable, does a collaboration agreement exist?</b>                                                                                                                                                                                     |                                                                                                                                                                                         |
|        | Hospitals                                                                                                                                                                                                                                       |                                                                                                                                                                                         |
| 4.6    | <b>If applicable, does a collaboration agreement exist?</b>                                                                                                                                                                                     |                                                                                                                                                                                         |
|        | Health insurers                                                                                                                                                                                                                                 |                                                                                                                                                                                         |
| 4.7    | <b>If applicable, does a collaboration agreement exist?</b>                                                                                                                                                                                     |                                                                                                                                                                                         |
|        | Social welfare organisations                                                                                                                                                                                                                    |                                                                                                                                                                                         |
| 4.8    | <b>If applicable, does a collaboration agreement exist?</b>                                                                                                                                                                                     |                                                                                                                                                                                         |
|        | Regional departments of the Dutch Alzheimer's Society                                                                                                                                                                                           |                                                                                                                                                                                         |
| 4.9    | <b>If applicable, does a collaboration agreement exist?</b>                                                                                                                                                                                     |                                                                                                                                                                                         |
|        | Consultation center of expertise (CCE)                                                                                                                                                                                                          |                                                                                                                                                                                         |
| 4.10   | <b>If applicable, does a collaboration agreement exist?</b>                                                                                                                                                                                     |                                                                                                                                                                                         |
|        | Volunteer organisations                                                                                                                                                                                                                         |                                                                                                                                                                                         |
| 4.11   | <b>If applicable, does a collaboration agreement exist?</b>                                                                                                                                                                                     |                                                                                                                                                                                         |
|        | Care support organisations                                                                                                                                                                                                                      |                                                                                                                                                                                         |
| 4.12   | <b>If applicable, does a collaboration agreement exist?</b>                                                                                                                                                                                     |                                                                                                                                                                                         |
|        | Other networks                                                                                                                                                                                                                                  |                                                                                                                                                                                         |
| 4.13   | <b>If applicable, does a collaboration agreement exist?</b>                                                                                                                                                                                     |                                                                                                                                                                                         |
|        | Other, namely.....                                                                                                                                                                                                                              |                                                                                                                                                                                         |
| 4.14   | <b>If applicable, does a collaboration agreement exist?</b>                                                                                                                                                                                     |                                                                                                                                                                                         |

5 **Please indicate which partners the organisation would like to include to the network?**

*Multiple answers are possible.*

- Research centres
- Nursing and home care organisations
- General practitioners
- Municipalities
- Mental care organisations
- Hospitals
- Health insurers
- Social welfare organisations
- Regional departments of the Dutch Alzheimer's Society
- Consultation centre of expertise
- Volunteer organisations
- Care support organisations
- Other, networks
- Other, namely.....
- None

5.2 **Are actions initiated to collaborate with currently missed partners?**

Yes, namely.....

.....

No

Unknown / prefer not to say

6 **What are the reasons to include or exclude these partners to the YOD-specific network?**

Please proceed to the next page.

Supplementary Material S2

The following questions address YOD-specific collaborations at a regional level.

| Number | Question                                                                                                                                                             | Response                                                                                                                                                                                                                                                                                                                                                                                                                                                                                                                                                                                                                                                                                                                                                                                                                                                                                                                                                                                                                                                                                                                                                                                                                                                                                                                                                                                                                                                                                                                                                                                                                     |
|--------|----------------------------------------------------------------------------------------------------------------------------------------------------------------------|------------------------------------------------------------------------------------------------------------------------------------------------------------------------------------------------------------------------------------------------------------------------------------------------------------------------------------------------------------------------------------------------------------------------------------------------------------------------------------------------------------------------------------------------------------------------------------------------------------------------------------------------------------------------------------------------------------------------------------------------------------------------------------------------------------------------------------------------------------------------------------------------------------------------------------------------------------------------------------------------------------------------------------------------------------------------------------------------------------------------------------------------------------------------------------------------------------------------------------------------------------------------------------------------------------------------------------------------------------------------------------------------------------------------------------------------------------------------------------------------------------------------------------------------------------------------------------------------------------------------------|
| 1      | <b>Which governance model does the network use?</b>                                                                                                                  | Participant governance; All network members govern the network<br><br>Lead organisation governance; 1 member of the network governs the network<br>Network Administrative Organisation governance; a separate administrative entity governs the network<br>Unknown / prefer not to say                                                                                                                                                                                                                                                                                                                                                                                                                                                                                                                                                                                                                                                                                                                                                                                                                                                                                                                                                                                                                                                                                                                                                                                                                                                                                                                                       |
| 2      | <b>Is a network coordinator involved?</b><br><i>Referring to a person who was hired to improve and optimise a YOD-specific network for integrated care delivery.</i> | <p>Yes</p> <p>2.1 <b>If applicable, how many hours per week are allocated to the network coordinator?</b> <input type="text"/> hours</p> <p>2.2 <b>If applicable, are the allocated hours considered sufficient to maintain, develop, or expand the YOD-specific network?</b><br/>                     Yes, because.....<br/>                     .....<br/>                     No, because.....<br/>                     .....<br/>                     Unknown / prefer not to say</p> <p>2.4 <b>If applicable, by whom is the salary of the network coordinator funded?</b><br/>                     Municipality<br/>                     A long-term care office<br/>                     Other, namely.....<br/>                     .....<br/>                     Unknown / prefer not to say</p> <p>No</p> <p>2.5 <b>Is another person responsible for coordinating YOD-specific collaborations among organisations?</b><br/> <i>For example, a professional combining this role with other responsibilities</i><br/>                     Yes, this is.....<br/>                     .....<br/>                     No</p> <p>2.5.2 <b>If applicable, how many hours per week are allocated to this person for coordinating?</b> <input type="text"/> hours</p> <p>2.5.3 <b>If applicable, are the allocated hours considered sufficient to maintain, develop, or expand the YOD-specific network?</b><br/>                     Yes, because.....<br/>                     .....<br/>                     No, because.....<br/>                     .....<br/>                     Unknown / prefer not to say</p> |

Please proceed to the next page

- 
3. **Does the network receives structural funding?**
- Yes  
No  
Unkown / prefer not to say
- 3.1 **If applicable, by whom is the network structural funded?**
- One funding source (health insurer, a long-term care office, or municipallity)  
Contributions by the network  
One healthcare provider  
Combination of one funding source and contribution by the network  
Combination of one funding source and one healthcare provider  
Combination of one healthcare provider and contribution by the network
- 3.2 **If applicable, is the funding considered sufficient to maintain or develop the YOD-specific network?**
- Yes  
No  
Unkown / prefer not to say
- 
- 4 **Are there agreements within the network regarding the organisation of care and support?**
- 5.1 **If applicable, are these agreements similar to the agreements within the organisation?Z**
- Yes  
No  
Partly  
Unknown
- 5.2 **If applicable, are there agreements on which organisation delivers care and support directly after individuals with young-onset dementia receive the diagnosis?**
- 5.3 **If applicable, when are case managers involved?**
- During the diagnostic process  
During the first 3 months after diagnosis  
After 3 months after diagnosis  
There are no agreements about this  
Case managers are not involved  
Other, namely.....  
.....

Please proceed to the next page.

The following questions address YOD-specific collaborations at a regional level.

| Number | Question                                                                                                                                                                                                        | Response                                                                                                                                                 |
|--------|-----------------------------------------------------------------------------------------------------------------------------------------------------------------------------------------------------------------|----------------------------------------------------------------------------------------------------------------------------------------------------------|
| 1      | <b>Which platforms are used by the organisation to communicate with the network?</b>                                                                                                                            |                                                                                                                                                          |
| 2      | <b>Please indicate the members of the network with whom the organisation has experience regarding their accessibility? And how would their accessibility be rated?</b><br><i>Multiple answers are possible.</i> |                                                                                                                                                          |
|        |                                                                                                                                                                                                                 | <div style="display: flex; justify-content: space-around;"> <span><i>Very poorly accessible</i></span> <span><i>Very easily accessible</i></span> </div> |
| 2.1    | Research centres (for example universities or colleges)<br><b>If applicable, rate their accessibility</b><br>Nursing and home care organisations (including case management)                                    |                                                                                                                                                          |
| 2.2    | <b>If applicable, rate their accessibility</b><br>General practitioners                                                                                                                                         |                                                                                                                                                          |
| 2.3    | <b>If applicable, rate their accessibility</b><br>Municipalities                                                                                                                                                |                                                                                                                                                          |
| 2.4    | <b>If applicable, rate their accessibility</b><br>Mental care organisations                                                                                                                                     |                                                                                                                                                          |
| 2.5    | <b>If applicable, rate their accessibility</b><br>Hospitals                                                                                                                                                     |                                                                                                                                                          |
| 2.6    | <b>If applicable, rate their accessibility</b><br>Health insurers                                                                                                                                               |                                                                                                                                                          |
| 2.7    | <b>If applicable, rate their accessibility</b><br>Social welfare organisations                                                                                                                                  |                                                                                                                                                          |
| 2.8    | <b>If applicable, rate their accessibility</b><br>Regional departments of the Dutch Alzheimer's Society                                                                                                         |                                                                                                                                                          |
| 2.9    | <b>If applicable, rate their accessibility</b><br>Consultation centre for expertise (CCE)                                                                                                                       |                                                                                                                                                          |
| 2.10   | <b>If applicable, rate their accessibility</b><br>Volunteer organisations                                                                                                                                       |                                                                                                                                                          |
| 2.11   | <b>If applicable, rate their accessibility</b><br>Support care organisations                                                                                                                                    |                                                                                                                                                          |
| 2.12   | <b>If applicable, rate their accessibility</b><br>Other networks                                                                                                                                                |                                                                                                                                                          |
| 2.13   | <b>If applicable, rate their accessibility</b><br>Other, namely.....                                                                                                                                            |                                                                                                                                                          |
| 2.14   | <b>If applicable, rate their accessibility</b>                                                                                                                                                                  |                                                                                                                                                          |

3 **Please indicate the members of the network with whom the organisation has experience collaborating. And how would this collaboration be rated?**

*Multiple answers are possible.*

Research centres (for example, universities or colleges) *Very poor collaboration* *Very good collaboration*

3.1 **If applicable, rate the collaboration**  
Nursing and home care organisations (including case management)

3.2 **If applicable, rate the collaboration**  
General practitioners

3.3 **If applicable, rate the collaboration**  
Municipalities

3.4 **If applicable, rate the collaboration**  
Mental care organisations

3.5 **If applicable, rate the collaboration**  
Hospitals

3.6 **If applicable, rate their accessibility**  
Health insurers

3.7 **If applicable, rate their accessibility**  
Social welfare organisations

3.8 **If applicable, rate their accessibility**  
Regional departments of the Dutch Alzheimer's Society

3.9 **If applicable, rate their accessibility**  
Consultation centre for expertise (CCE)

3.10 **If applicable, rate their accessibility**  
Volunteer organisations

3.11 **If applicable, rate the collaboration**  
Support care organisations

3.12 **If applicable, rate the collaboration**  
Other networks

3.13 **If applicable, rate the collaboration**  
Other, namely.....

3.14 **If applicable, rate the collaboration**

4 **Please indicate the experience of the organisation in terms of collaborating with providers of these services. And how would this collaboration be rated?**

*Multiple answers are possible.*

Case managers *Very poor collaboration* *Very good collaboration*

4.1 **If applicable, rate the collaboration**  
Day care treatment

4.2 **If applicable, rate the collaboration**  
Day care services

4.3 **If applicable, rate the collaboration**  
Nursing homes

4.4 **If applicable, rate the collaboration**  
Other, namely.....

4.5 **If applicable, rate the collaboration**

The following questions address YOD-specific collaborations at a regional level.

| Number | Question                                                                                          | Response                                                    |
|--------|---------------------------------------------------------------------------------------------------|-------------------------------------------------------------|
| 1      | <b>Please describe succesful elements in the current collaborations within the network.</b>       | <div style="border: 1px dashed black; height: 75px;"></div> |
| 2      | <b>Please describe hindering elements in the current collaborations within the network.</b>       | <div style="border: 1px dashed black; height: 75px;"></div> |
| 3      | <b>Are actions initiated to address these hindering elements?</b>                                 | Yes<br>No<br>Not applicable<br>Unknown / prefer not to say  |
| 4      | <b>Are there any additional comments about the collaboration within the YOD-specific network?</b> | <div style="border: 1px dashed black; height: 75px;"></div> |

If the organisation is part of other networks, please procees to all indicated pages:

at an inter-regional level: [page 3](#)

at a local level: [page 16](#)

at another level: [page 23](#)

If the organisation is **not** part of other networks, please proceed to [page 30](#)

The following questions address YOD-specific collaborations at a local level

| Number | Question                                                                                                                                                                                                                                     | Response                                                                                                                                                                                |
|--------|----------------------------------------------------------------------------------------------------------------------------------------------------------------------------------------------------------------------------------------------|-----------------------------------------------------------------------------------------------------------------------------------------------------------------------------------------|
| 1      | <b>To which local network is the organisation affiliated with?</b>                                                                                                                                                                           | <input type="text"/>                                                                                                                                                                    |
| 2      | <b>What is the aim of collaborating?</b><br><i>Multiple answers are possible.</i>                                                                                                                                                            | <p>We exchange knowledge about individuals with young-onset dementia</p> <p>We jointly improve service delivery for individuals with young-onset dementia</p> <p>Other, namely.....</p> |
| 3      | <b>How many organisations are affiliated to this network?</b>                                                                                                                                                                                | <input type="text"/> organisations                                                                                                                                                      |
| 4      | <b>Please indicate which partners are currently part of the network to deliver integrated care for individuals with young-onset dementia? And to which extent is this collaboration formalised?</b><br><i>Multiple answers are possible.</i> |                                                                                                                                                                                         |
|        | Research Centres (for example universities or colleges)                                                                                                                                                                                      |                                                                                                                                                                                         |
| 4.1    | <b>If applicable, does a collaboration agreement exist?</b>                                                                                                                                                                                  |                                                                                                                                                                                         |
|        | Nursing and home care organisations (including casemanagement)                                                                                                                                                                               |                                                                                                                                                                                         |
| 4.2    | <b>If applicable, does a collaboration agreement exist?</b>                                                                                                                                                                                  |                                                                                                                                                                                         |
|        | General practitioners                                                                                                                                                                                                                        |                                                                                                                                                                                         |
| 4.3    | <b>If applicable, does a collaboration agreement exist?</b>                                                                                                                                                                                  |                                                                                                                                                                                         |
|        | Municipalities                                                                                                                                                                                                                               |                                                                                                                                                                                         |
| 4.4    | <b>If applicable, does a collaboration agreement exist?</b>                                                                                                                                                                                  |                                                                                                                                                                                         |
|        | Mental care organisations                                                                                                                                                                                                                    |                                                                                                                                                                                         |
| 4.5    | <b>If applicable, does a collaboration agreement exist?</b>                                                                                                                                                                                  |                                                                                                                                                                                         |
|        | Hospitals                                                                                                                                                                                                                                    |                                                                                                                                                                                         |
| 4.6    | <b>If applicable, does a collaboration agreement exist?</b>                                                                                                                                                                                  |                                                                                                                                                                                         |
|        | Health insurers                                                                                                                                                                                                                              |                                                                                                                                                                                         |
| 4.7    | <b>If applicable, does a collaboration agreement exist?</b>                                                                                                                                                                                  |                                                                                                                                                                                         |
|        | Social welfare organisations                                                                                                                                                                                                                 |                                                                                                                                                                                         |
| 4.8    | <b>If applicable, does a collaboration agreement exist?</b>                                                                                                                                                                                  |                                                                                                                                                                                         |
|        | Regional departments of the Dutch Alzheimer's Society                                                                                                                                                                                        |                                                                                                                                                                                         |
| 4.9    | <b>If applicable, does a collaboration agreement exist?</b>                                                                                                                                                                                  |                                                                                                                                                                                         |
|        | Consultation centre of expertise (CCE)                                                                                                                                                                                                       |                                                                                                                                                                                         |
| 4.10   | <b>If applicable, does a collaboration agreement exist?</b>                                                                                                                                                                                  |                                                                                                                                                                                         |
|        | Volunteer organisations                                                                                                                                                                                                                      |                                                                                                                                                                                         |
| 4.11   | <b>If applicable, does a collaboration agreement exist?</b>                                                                                                                                                                                  |                                                                                                                                                                                         |
|        | Care support organisations                                                                                                                                                                                                                   |                                                                                                                                                                                         |
| 4.12   | <b>If applicable, does a collaboration agreement exist?</b>                                                                                                                                                                                  |                                                                                                                                                                                         |
|        | Other networks                                                                                                                                                                                                                               |                                                                                                                                                                                         |
| 4.13   | <b>If applicable, does a collaboration agreement exist?</b>                                                                                                                                                                                  |                                                                                                                                                                                         |
|        | Other, namely.....                                                                                                                                                                                                                           |                                                                                                                                                                                         |
| 4.14   | <b>If applicable, does a collaboration agreement exist?</b>                                                                                                                                                                                  |                                                                                                                                                                                         |

5 **Please indicate which partners the organisation would like to include to the network?**

*Multiple answers are possible.*

- Research centres
- Nursing and home care organisations
- General practitioners
- Municipalities
- Mental care organisations
- Hospitals
- Health insurers
- Social welfare organisations
- Regional departments of the Dutch Alzheimer's Society
- Consultation centre of expertise
- Volunteer organisations
- Care support organisations
- Other, networks
- Other, namely.....
- None

5.2 **Are actions initiated to collaborate with currently missed partners?**

- Yes, namely.....
- .....
- No
- Unknown / prefer not to say

6 **What are the reasons to include or exclude these partners to the YOD-specific network?**

Please proceed to the next page.

The following questions address YOD-specific collaborations at a local level.

| Number | Question                                                                                                                                                             | Response                                                                                                                                                                                                                                                                                                                                                                                                                                                                                                                                                                                                                                                                                                                                                                                                                                                                                                                                                                                                                                                                                                                                                                                                |
|--------|----------------------------------------------------------------------------------------------------------------------------------------------------------------------|---------------------------------------------------------------------------------------------------------------------------------------------------------------------------------------------------------------------------------------------------------------------------------------------------------------------------------------------------------------------------------------------------------------------------------------------------------------------------------------------------------------------------------------------------------------------------------------------------------------------------------------------------------------------------------------------------------------------------------------------------------------------------------------------------------------------------------------------------------------------------------------------------------------------------------------------------------------------------------------------------------------------------------------------------------------------------------------------------------------------------------------------------------------------------------------------------------|
| 1      | <b>Which governance model does the network use?</b>                                                                                                                  | Participant governance; All network members govern the network<br><br>Lead organisation governance; 1 member of the network governs the network<br>Network Administrative Organisation governance; a separate administrative entity governs the network<br>Unknown / prefer not to say                                                                                                                                                                                                                                                                                                                                                                                                                                                                                                                                                                                                                                                                                                                                                                                                                                                                                                                  |
| 2      | <b>Is a network coordinator involved?</b><br><i>Referring to a person who was hired to improve and optimise a YOD-specific network for integrated care delivery.</i> | Yes<br><br>2.1 <b>If applicable, how many hours per week are allocated to the network coordinator?</b> <input type="text"/> hours<br><br>2.2 <b>If applicable, are the allocated hours considered sufficient to maintain, develop, or expand the YOD-specific network?</b><br>Yes, because.....<br>.....<br>No, because.....<br>.....<br>Unknown / prefer not to say<br><br>2.4 <b>If applicable, by whom is the salary of the network coordinator funded?</b><br>Municipality<br>A long-term care office<br>Other, namely.....<br>.....<br>Unknown / prefer not to say<br><br>No<br><br>2.5 <b>Is another person responsible for coordinating YOD-specific collaborations among organisations?</b><br><i>For example, a professional combining this role with other responsibilities</i><br>Yes, this is.....<br>.....<br>No<br><br>2.5.2 <b>If applicable, how many hours per week are allocated to this person for coordinating?</b> <input type="text"/> hours<br><br>2.5.3 <b>If applicable, are the allocated hours considered sufficient to maintain, develop, or expand the YOD-specific network?</b><br>Yes, because.....<br>.....<br>No, because.....<br>.....<br>Unknown / prefer not to say |

Please proceed to the next page

|     |                                                                                                                                                                        |                                                                                                                                                                                                                                                                                                                                                           |
|-----|------------------------------------------------------------------------------------------------------------------------------------------------------------------------|-----------------------------------------------------------------------------------------------------------------------------------------------------------------------------------------------------------------------------------------------------------------------------------------------------------------------------------------------------------|
| 3.  | <b>Does the network receives structural funding?</b>                                                                                                                   | Yes<br>No<br>Unkown / prefer not to say                                                                                                                                                                                                                                                                                                                   |
| 3.1 | <b>If applicable, by whom is the network structural funded?</b>                                                                                                        | One funding source (health insurer, a long-term care office, or municipallity)<br>Contributions by the network<br>One healthcare provider<br>Combination of one funding source and contribution by the network<br>Combination of one funding source and one healthcare provider<br>Combination of one healthcare provider and contribution by the network |
| 3.2 | <b>If applicable, is the funding considered sufficient to maintain or develop the YOD-specific network?</b>                                                            | Yes<br>No<br>Unkown / prefer not to say                                                                                                                                                                                                                                                                                                                   |
| 4   | <b>Are there agreements within the network regarding the organisation of care and support?</b>                                                                         |                                                                                                                                                                                                                                                                                                                                                           |
| 5.1 | <b>If applicable, are these agreements similair to the agreements within the organisation?Z</b>                                                                        | Yes<br>No<br>Partly<br>Unknown                                                                                                                                                                                                                                                                                                                            |
| 5.2 | <b>If applicable, are there agreements on which organisation delivers care and support directly after individuals with young-onset dementia receive the diagnosis?</b> |                                                                                                                                                                                                                                                                                                                                                           |
| 5.3 | <b>If applicable, when are case managers involved?</b>                                                                                                                 | During the diagnostic process<br>During the first 3 months after diagnosis<br>After 3 months after diagnosis<br>There are no agreements about this<br>Case managers are not involved<br>Other, namely.....<br>.....                                                                                                                                       |

Please proceed to the next page.

The following questions address YOD-specific collaborations at a local level.

| Number | Question                                                                                                                                                                                                        | Response                                                                                                                                                  |
|--------|-----------------------------------------------------------------------------------------------------------------------------------------------------------------------------------------------------------------|-----------------------------------------------------------------------------------------------------------------------------------------------------------|
| 1      | <b>Which platforms are used by the organisation to communicate with the network?</b>                                                                                                                            |                                                                                                                                                           |
| 2      | <b>Please indicate the members of the network with whom the organisation has experience regarding their accessibility? And how would their accessibility be rated?</b><br><i>Multiple answers are possible.</i> |                                                                                                                                                           |
|        |                                                                                                                                                                                                                 | <div style="display: flex; justify-content: space-between;"> <span><i>Very poorly accessible</i></span> <span><i>Very easily accessible</i></span> </div> |
| 2.1    | Research centres (for example universities or colleges)<br><b>If applicable, rate their accessibility</b><br>Nursing and home care organisations (including case management)                                    |                                                                                                                                                           |
| 2.2    | <b>If applicable, rate their accessibility</b><br>General practitioners                                                                                                                                         |                                                                                                                                                           |
| 2.3    | <b>If applicable, rate their accessibility</b><br>Municipalities                                                                                                                                                |                                                                                                                                                           |
| 2.4    | <b>If applicable, rate their accessibility</b><br>Mental care organisations                                                                                                                                     |                                                                                                                                                           |
| 2.5    | <b>If applicable, rate their accessibility</b><br>Hospitals                                                                                                                                                     |                                                                                                                                                           |
| 2.6    | <b>If applicable, rate their accessibility</b><br>Health insurers                                                                                                                                               |                                                                                                                                                           |
| 2.7    | <b>If applicable, rate their accessibility</b><br>Social welfare organisations                                                                                                                                  |                                                                                                                                                           |
| 2.8    | <b>If applicable, rate their accessibility</b><br>Regional departments of the Dutch Alzheimer's Society                                                                                                         |                                                                                                                                                           |
| 2.9    | <b>If applicable, rate their accessibility</b><br>Consultation centre for expertise (CCE)                                                                                                                       |                                                                                                                                                           |
| 2.10   | <b>If applicable, rate their accessibility</b><br>Volunteer organisations                                                                                                                                       |                                                                                                                                                           |
| 2.11   | <b>If applicable, rate their accessibility</b><br>Support care organisations                                                                                                                                    |                                                                                                                                                           |
| 2.12   | <b>If applicable, rate their accessibility</b><br>Other networks                                                                                                                                                |                                                                                                                                                           |
| 2.13   | <b>If applicable, rate their accessibility</b><br>Other, namely.....                                                                                                                                            |                                                                                                                                                           |
| 2.14   | <b>If applicable, rate their accessibility</b>                                                                                                                                                                  |                                                                                                                                                           |

3 **Please indicate the members of the network with whom the organisation has experience collaborating. And how would this collaboration be rated?**

*Multiple answers are possible.*

Research centres (for example, universities or colleges) *Very poor collaboration* *Very good collaboration*

3.1 **If applicable, rate the collaboration**  
Nursing and home care organisations (including case management)

3.2 **If applicable, rate the collaboration**  
General practitioners

3.3 **If applicable, rate the collaboration**  
Municipalities

3.4 **If applicable, rate the collaboration**  
Mental care organisations

3.5 **If applicable, rate the collaboration**  
Hospitals

3.6 **If applicable, rate their accessibility**  
Health insurers

3.7 **If applicable, rate their accessibility**  
Social welfare organisations

3.8 **If applicable, rate their accessibility**  
Regional departments of the Dutch Alzheimer's Society

3.9 **If applicable, rate their accessibility**  
Consultation centre for expertise (CCE)

3.10 **If applicable, rate their accessibility**  
Volunteer organisations

3.11 **If applicable, rate the collaboration**  
Support care organisations

3.12 **If applicable, rate the collaboration**  
Other networks

3.13 **If applicable, rate the collaboration**  
Other, namely.....

3.14 **If applicable, rate the collaboration**

4 **Please indicate the experience of the organisation in terms of collaborating with providers of these services. And how would this collaboration be rated?**

*Multiple answers are possible.*

Case managers *Very poor collaboration* *Very good collaboration*

4.1 **If applicable, rate the collaboration**  
Day care treatment

4.2 **If applicable, rate the collaboration**  
Day care services

4.3 **If applicable, rate the collaboration**  
Nursing homes

4.4 **If applicable, rate the collaboration**  
Other, namely.....

4.5 **If applicable, rate the collaboration**

The following questions address YOD-specific collaborations at a local level.

| Number | Question                                                                                          | Response                                                    |
|--------|---------------------------------------------------------------------------------------------------|-------------------------------------------------------------|
| 1      | <b>Please describe succesful elements in the current collaborations within the network.</b>       | <div style="border: 1px dashed black; height: 76px;"></div> |
| 2      | <b>Please describe hindering elements in the current collaborations within the network.</b>       | <div style="border: 1px dashed black; height: 76px;"></div> |
| 3      | <b>Are actions initiated to address these hindering elements?</b>                                 | Yes<br>No<br>Not applicable<br>Unknown / prefer not to say  |
| 4      | <b>Are there any additional comments about the collaboration within the YOD-specific network?</b> | <div style="border: 1px dashed black; height: 76px;"></div> |

If the organisation is part of other networks, please proceed to all indicated pages:

at an inter-regional level: [page 3](#)

at a regional level: [page 9](#)

at another level: [page 23](#)

If the organisation is **not** part of other networks, please proceed to [page 30](#)

The following questions address YOD-specific collaborations at another level

| Number | Question                                                                                                                                                                                                                                     | Response                                                                                                                                                                                |
|--------|----------------------------------------------------------------------------------------------------------------------------------------------------------------------------------------------------------------------------------------------|-----------------------------------------------------------------------------------------------------------------------------------------------------------------------------------------|
| 1      | <b>To which other network is the organisation affiliated with?</b>                                                                                                                                                                           | <input type="text"/>                                                                                                                                                                    |
| 2      | <b>What is the aim of collaborating?</b><br><i>Multiple answers are possible.</i>                                                                                                                                                            | <p>We exchange knowledge about individuals with young-onset dementia</p> <p>We jointly improve service delivery for individuals with young-onset dementia</p> <p>Other, namely.....</p> |
| 3      | <b>How many organisations are affiliated to this network?</b>                                                                                                                                                                                | <input type="text"/> organisations                                                                                                                                                      |
| 4      | <b>Please indicate which partners are currently part of the network to deliver integrated care for individuals with young-onset dementia? And to which extent is this collaboration formalised?</b><br><i>Multiple answers are possible.</i> |                                                                                                                                                                                         |
|        | Research Centres (for example universities or colleges)                                                                                                                                                                                      |                                                                                                                                                                                         |
| 4.1    | <b>If applicable, does a collaboration agreement exist?</b>                                                                                                                                                                                  |                                                                                                                                                                                         |
|        | Nursing and home care organisations (including casemanagement)                                                                                                                                                                               |                                                                                                                                                                                         |
| 4.2    | <b>If applicable, does a collaboration agreement exist?</b>                                                                                                                                                                                  |                                                                                                                                                                                         |
|        | General practitioners                                                                                                                                                                                                                        |                                                                                                                                                                                         |
| 4.3    | <b>If applicable, does a collaboration agreement exist?</b>                                                                                                                                                                                  |                                                                                                                                                                                         |
|        | Municipalities                                                                                                                                                                                                                               |                                                                                                                                                                                         |
| 4.4    | <b>If applicable, does a collaboration agreement exist?</b>                                                                                                                                                                                  |                                                                                                                                                                                         |
|        | Mental care organisations                                                                                                                                                                                                                    |                                                                                                                                                                                         |
| 4.5    | <b>If applicable, does a collaboration agreement exist?</b>                                                                                                                                                                                  |                                                                                                                                                                                         |
|        | Hospitals                                                                                                                                                                                                                                    |                                                                                                                                                                                         |
| 4.6    | <b>If applicable, does a collaboration agreement exist?</b>                                                                                                                                                                                  |                                                                                                                                                                                         |
|        | Health insurers                                                                                                                                                                                                                              |                                                                                                                                                                                         |
| 4.7    | <b>If applicable, does a collaboration agreement exist?</b>                                                                                                                                                                                  |                                                                                                                                                                                         |
|        | Social welfare organisations                                                                                                                                                                                                                 |                                                                                                                                                                                         |
| 4.8    | <b>If applicable, does a collaboration agreement exist?</b>                                                                                                                                                                                  |                                                                                                                                                                                         |
|        | Regional departments of the Dutch Alzheimer's Society                                                                                                                                                                                        |                                                                                                                                                                                         |
| 4.9    | <b>If applicable, does a collaboration agreement exist?</b>                                                                                                                                                                                  |                                                                                                                                                                                         |
|        | Consultation centre of expertise (CCE)                                                                                                                                                                                                       |                                                                                                                                                                                         |
| 4.10   | <b>If applicable, does a collaboration agreement exist?</b>                                                                                                                                                                                  |                                                                                                                                                                                         |
|        | Volunteer organisations                                                                                                                                                                                                                      |                                                                                                                                                                                         |
| 4.11   | <b>If applicable, does a collaboration agreement exist?</b>                                                                                                                                                                                  |                                                                                                                                                                                         |
|        | Care support organisations                                                                                                                                                                                                                   |                                                                                                                                                                                         |
| 4.12   | <b>If applicable, does a collaboration agreement exist?</b>                                                                                                                                                                                  |                                                                                                                                                                                         |
|        | Other networks                                                                                                                                                                                                                               |                                                                                                                                                                                         |
| 4.13   | <b>If applicable, does a collaboration agreement exist?</b>                                                                                                                                                                                  |                                                                                                                                                                                         |
|        | Other, namely.....                                                                                                                                                                                                                           |                                                                                                                                                                                         |
| 4.14   | <b>If applicable, does a collaboration agreement exist?</b>                                                                                                                                                                                  |                                                                                                                                                                                         |

5 **Please indicate which partners the organisation would like to include to the network?**

*Multiple answers are possible.*

- Research centres
- Nursing and home care organisations
- General practitioners
- Municipalities
- Mental care organisations
- Hospitals
- Health insurers
- Social welfare organisations
- Regional departments of the Dutch Alzheimer's Society
- Consultation centre of expertise
- Volunteer organisations
- Care support organisations
- Other, networks
- Other, namely.....
- None

5.2 **Are actions initiated to collaborate with currently missed partners?**

- Yes, namely.....
- .....
- No
- Unknown / prefer not to say

6 **What are the reasons to include or exclude these partners to the YOD-specific network?**

Please proceed to the next page.

The following questions address YOD-specific collaborations at another level.

| Number | Question                                                                                                                                                             | Response                                                                                                                                                                                                                                                                                                                                                                                                                                                                                                                                                                                                                                                                                                                                                                                                                                                                                                                                                                                                                                                                                                                                                                                                                                                                                                                                                                                                                                                                                                                                                                                                                     |
|--------|----------------------------------------------------------------------------------------------------------------------------------------------------------------------|------------------------------------------------------------------------------------------------------------------------------------------------------------------------------------------------------------------------------------------------------------------------------------------------------------------------------------------------------------------------------------------------------------------------------------------------------------------------------------------------------------------------------------------------------------------------------------------------------------------------------------------------------------------------------------------------------------------------------------------------------------------------------------------------------------------------------------------------------------------------------------------------------------------------------------------------------------------------------------------------------------------------------------------------------------------------------------------------------------------------------------------------------------------------------------------------------------------------------------------------------------------------------------------------------------------------------------------------------------------------------------------------------------------------------------------------------------------------------------------------------------------------------------------------------------------------------------------------------------------------------|
| 1      | <b>Which governance model does the network use?</b>                                                                                                                  | Participant governance; All network members govern the network<br><br>Lead organisation governance; 1 member of the network governs the network<br>Network Administrative Organisation governance; a separate administrative entity governs the network<br>Unknown / prefer not to say                                                                                                                                                                                                                                                                                                                                                                                                                                                                                                                                                                                                                                                                                                                                                                                                                                                                                                                                                                                                                                                                                                                                                                                                                                                                                                                                       |
| 2      | <b>Is a network coordinator involved?</b><br><i>Referring to a person who was hired to improve and optimise a YOD-specific network for integrated care delivery.</i> | <p>Yes</p> <p>2.1 <b>If applicable, how many hours per week are allocated to the network coordinator?</b> <input type="text"/> hours</p> <p>2.2 <b>If applicable, are the allocated hours considered sufficient to maintain, develop, or expand the YOD-specific network?</b><br/>                     Yes, because.....<br/>                     .....<br/>                     No, because.....<br/>                     .....<br/>                     Unknown / prefer not to say</p> <p>2.4 <b>If applicable, by whom is the salary of the network coordinator funded?</b><br/>                     Municipality<br/>                     A long-term care office<br/>                     Other, namely.....<br/>                     .....<br/>                     Unknown / prefer not to say</p> <p>No</p> <p>2.5 <b>Is another person responsible for coordinating YOD-specific collaborations among organisations?</b><br/> <i>For example, a professional combining this role with other responsibilities</i><br/>                     Yes, this is.....<br/>                     .....<br/>                     No</p> <p>2.5.2 <b>If applicable, how many hours per week are allocated to this person for coordinating?</b> <input type="text"/> hours</p> <p>2.5.3 <b>If applicable, are the allocated hours considered sufficient to maintain, develop, or expand the YOD-specific network?</b><br/>                     Yes, because.....<br/>                     .....<br/>                     No, because.....<br/>                     .....<br/>                     Unknown / prefer not to say</p> |

Please proceed to the next page

|     |                                                                                                                                                                        |                                                                                                                                                                                                                                                                                                                                                           |
|-----|------------------------------------------------------------------------------------------------------------------------------------------------------------------------|-----------------------------------------------------------------------------------------------------------------------------------------------------------------------------------------------------------------------------------------------------------------------------------------------------------------------------------------------------------|
| 3.  | <b>Does the network receives structural funding?</b>                                                                                                                   | Yes<br>No<br>Unkown / prefer not to say                                                                                                                                                                                                                                                                                                                   |
| 3.1 | <b>If applicable, by whom is the network structural funded?</b>                                                                                                        | One funding source (health insurer, a long-term care office, or municipallity)<br>Contributions by the network<br>One healthcare provider<br>Combination of one funding source and contribution by the network<br>Combination of one funding source and one healthcare provider<br>Combination of one healthcare provider and contribution by the network |
| 3.2 | <b>If applicable, is the funding considered sufficient to maintain or develop the YOD-specific network?</b>                                                            | Yes<br>No<br>Unkown / prefer not to say                                                                                                                                                                                                                                                                                                                   |
| 4   | <b>Are there agreements within the network regarding the organisation of care and support?</b>                                                                         |                                                                                                                                                                                                                                                                                                                                                           |
| 5.1 | <b>If applicable, are these agreements similair to the agreements within the organisation?</b>                                                                         | Yes<br>No<br>Partly<br>Unknown                                                                                                                                                                                                                                                                                                                            |
| 5.2 | <b>If applicable, are there agreements on which organisation delivers care and support directly after individuals with young-onset dementia receive the diagnosis?</b> |                                                                                                                                                                                                                                                                                                                                                           |
| 5.3 | <b>If applicable, when are case managers involved?</b>                                                                                                                 | During the diagnostic process<br>During the first 3 months after diagnosis<br>After 3 months after diagnosis<br>There are no agreements about this<br>Case managers are not involved<br>Other, namely.....<br>.....                                                                                                                                       |

Please proceed to the next page.

The following questions address YOD-specific collaborations at another level.

| Number | Question                                                                                                                                                                                                        | Response                                                                                                                                                  |
|--------|-----------------------------------------------------------------------------------------------------------------------------------------------------------------------------------------------------------------|-----------------------------------------------------------------------------------------------------------------------------------------------------------|
| 1      | <b>Which platforms are used by the organisation to communicate with the network?</b>                                                                                                                            |                                                                                                                                                           |
| 2      | <b>Please indicate the members of the network with whom the organisation has experience regarding their accessibility? And how would their accessibility be rated?</b><br><i>Multiple answers are possible.</i> |                                                                                                                                                           |
|        |                                                                                                                                                                                                                 | <div style="display: flex; justify-content: space-between;"> <span><i>Very poorly accessible</i></span> <span><i>Very easily accessible</i></span> </div> |
| 2.1    | Research centres (for example universities or colleges)<br><b>If applicable, rate their accessibility</b>                                                                                                       |                                                                                                                                                           |
|        | Nursing and home care organisations (including case management)<br><b>If applicable, rate their accessibility</b>                                                                                               |                                                                                                                                                           |
| 2.2    | General practitioners<br><b>If applicable, rate their accessibility</b>                                                                                                                                         |                                                                                                                                                           |
| 2.3    | Municipalities<br><b>If applicable, rate their accessibility</b>                                                                                                                                                |                                                                                                                                                           |
| 2.4    | Mental care organisations<br><b>If applicable, rate their accessibility</b>                                                                                                                                     |                                                                                                                                                           |
| 2.5    | Hospitals<br><b>If applicable, rate their accessibility</b>                                                                                                                                                     |                                                                                                                                                           |
| 2.6    | Health insurers<br><b>If applicable, rate their accessibility</b>                                                                                                                                               |                                                                                                                                                           |
| 2.7    | Social welfare organisations<br><b>If applicable, rate their accessibility</b>                                                                                                                                  |                                                                                                                                                           |
| 2.8    | Regional departments of the Dutch Alzheimer's Society<br><b>If applicable, rate their accessibility</b>                                                                                                         |                                                                                                                                                           |
| 2.9    | Consultation centre for expertise (CCE)<br><b>If applicable, rate their accessibility</b>                                                                                                                       |                                                                                                                                                           |
| 2.10   | Volunteer organisations<br><b>If applicable, rate their accessibility</b>                                                                                                                                       |                                                                                                                                                           |
| 2.11   | Support care organisations<br><b>If applicable, rate their accessibility</b>                                                                                                                                    |                                                                                                                                                           |
| 2.12   | Other networks<br><b>If applicable, rate their accessibility</b>                                                                                                                                                |                                                                                                                                                           |
| 2.13   | Other, namely.....<br><b>If applicable, rate their accessibility</b>                                                                                                                                            |                                                                                                                                                           |
| 2.14   | <b>If applicable, rate their accessibility</b>                                                                                                                                                                  |                                                                                                                                                           |

3 **Please indicate the members of the network with whom the organisation has experience collaborating. And how would this collaboration be rated?**

*Multiple answers are possible.*

Research centres (for example, universities or colleges) *Very poor collaboration* *Very good collaboration*

3.1 **If applicable, rate the collaboration**

Nursing and home care organisations (including case management)

3.2 **If applicable, rate the collaboration**

General practitioners

3.3 **If applicable, rate the collaboration**

Municipalities

3.4 **If applicable, rate the collaboration**

Mental care organisations

3.5 **If applicable, rate the collaboration**

Hospitals

3.6 **If applicable, rate their accessibility**

Health insurers

3.7 **If applicable, rate their accessibility**

Social welfare organisations

3.8 **If applicable, rate their accessibility**

Regional departments of the Dutch Alzheimer's Society

3.9 **If applicable, rate their accessibility**

Consultation centre for expertise (CCE)

3.10 **If applicable, rate their accessibility**

Volunteer organisations

3.11 **If applicable, rate the collaboration**

Support care organisations

3.12 **If applicable, rate the collaboration**

Other networks

3.13 **If applicable, rate the collaboration**

Other, namely.....

3.14 **If applicable, rate the collaboration**

4 **Please indicate the experience of the organisation in terms of collaborating with providers of these services. And how would this collaboration be rated?**

*Multiple answers are possible.*

Case managers *Very poor collaboration* *Very good collaboration*

4.1 **If applicable, rate the collaboration**

Day care treatment

4.2 **If applicable, rate the collaboration**

Day care services

4.3 **If applicable, rate the collaboration**

Nursing homes

4.4 **If applicable, rate the collaboration**

Other, namely.....

4.5 **If applicable, rate the collaboration**

The following questions address YOD-specific collaborations at another level.

| Number | Question                                                                                          | Response                                                    |
|--------|---------------------------------------------------------------------------------------------------|-------------------------------------------------------------|
| 1      | <b>Please describe succesful elements in the current collaborations within the network.</b>       | <div style="border: 1px dashed black; height: 75px;"></div> |
| 2      | <b>Please describe hindering elements in the current collaborations within the network.</b>       | <div style="border: 1px dashed black; height: 75px;"></div> |
| 3      | <b>Are actions initiated to address these hindering elements?</b>                                 | Yes<br>No<br>Not applicable<br>Unknown / prefer not to say  |
| 4      | <b>Are there any additional comments about the collaboration within the YOD-specific network?</b> | <div style="border: 1px dashed black; height: 75px;"></div> |

If the organisation is part of other networks, please procees to all indicated pages:

at an inter-regional level: [page 3](#)

at a regional level: [page 9](#)

at another level: [page 23](#)

If the organisation is **not** part of other networks, please proceed to [page 30](#)

---

|   |                                                       |     |
|---|-------------------------------------------------------|-----|
| 1 | <b>May we contact the organisation in the future?</b> | Yes |
|   |                                                       | No  |

---

This is the end of the domain on YOD-specific collaborations.

Supplementary Material S2
